# Supplementary material for: The Biology of ‘Risk-On’. Decreasing Inflammatory and Stress Responses on a London Trading Floor
Source: bioRxiv or medRxiv preprint supplement (doi:10.1101/473157), 2018-11-24
Supplement: Supplementary file [file media-1.pdf]

# Supplementary Information

## The Biology of ‘Risk-On’. Decreasing Inflammatory and Stress Responses on a London Trading Floor

N. Z. Xie, L. Page, D. A. Granger, J. M. Coates

| Bonds & Interest Rates |      |        |         |       |       | Equities |      |      | Commodity |      | FX   |
|------------------------|------|--------|---------|-------|-------|----------|------|------|-----------|------|------|
| Europe                 |      |        |         | UK    | US    | Europe   |      | US   |           |      |      |
| Bund                   | Bobl | Schatz | Euribor | Gilt  | Notes | Stoxx    | Dax  | S&P  | Gold      | Oil  | \$/€ |
| 32.2%                  | 4.7% | 3.0%   | 3.6%    | 11.8% | 8.0%  | 16%      | 6.2% | 5.0% | 2.7%      | 4.1% | 2.7% |
| 43.5%                  |      |        |         | 11.8% | 8.0%  | 22.2%    |      | 5.0% | 6.8%      |      | 2.7% |
| 63.1%                  |      |        |         |       |       | 27.4%    |      |      | 6.8%      |      | 2.7% |

**Future Contracts Legend.** Bund: German 10yr bond. Bobl: German 5yr bond. Schatz: German 2yr bond. Euribor: Euro 3 month deposit rate. Gilt: UK 10yr bond. Notes: US 10yr bond. Stoxx: Eurostoxx equity index. Dax: German equity index. S&P: U.S. equity index.

The index of the markets traded was weighted by number of trades, consisting of 66.9% Bunds (32.2%/(32.2%+16%)) and 33.1% Eurostoxx (16%/(32.2%+16%))

### Vector Autoregressive (VAR) models.

$$\begin{cases} Cortisol_t = \beta_{10} + \beta_{11}Cortisol_{t-1} + \beta_{12}IL1\beta_{t-1} + \beta_{13}IL6_{t-1} + \beta_{14}IL8_{t-1} + \beta_{15}TNF\alpha_{t-1} + \varepsilon_{1t} \\ IL1\beta_t = \beta_{20} + \beta_{21}Cortisol_{t-1} + \beta_{22}IL1\beta_{t-1} + \beta_{23}IL6_{t-1} + \beta_{24}IL8_{t-1} + \beta_{25}TNF\alpha_{t-1} + \varepsilon_{2t} \\ IL6_t = \beta_{30} + \beta_{31}Cortisol_{t-1} + \beta_{32}IL1\beta_{t-1} + \beta_{33}IL6_{t-1} + \beta_{34}IL8_{t-1} + \beta_{35}TNF\alpha_{t-1} + \varepsilon_{3t} \\ IL8_t = \beta_{40} + \beta_{41}Cortisol_{t-1} + \beta_{42}IL1\beta_{t-1} + \beta_{43}IL6_{t-1} + \beta_{44}IL8_{t-1} + \beta_{45}TNF\alpha_{t-1} + \varepsilon_{4t} \\ TNF\alpha_t = \beta_{50} + \beta_{51}Cortisol_{t-1} + \beta_{52}IL1\beta_{t-1} + \beta_{53}IL6_{t-1} + \beta_{54}IL8_{t-1} + \beta_{55}TNF\alpha_{t-1} + \varepsilon_{5t} \end{cases}$$

Table 2: VAR Model Estimation Results:

|                               | (1)                         | (2)                     | (3)                    | (4)                    | (5)                     |
|-------------------------------|-----------------------------|-------------------------|------------------------|------------------------|-------------------------|
|                               | <i>Cortisol<sub>t</sub></i> | <i>IL1β<sub>t</sub></i> | <i>IL6<sub>t</sub></i> | <i>IL8<sub>t</sub></i> | <i>TNFα<sub>t</sub></i> |
| <i>Cortisol<sub>t-1</sub></i> | -0.364*<br>(-1.78)          | -0.108<br>(-0.73)       | 0.065<br>(0.50)        | 0.200<br>(1.45)        | 0.123<br>(0.89)         |
| <i>IL1β<sub>t-1</sub></i>     | 0.367<br>(1.02)             | -0.162<br>(-0.63)       | -0.752***<br>(-3.29)   | -0.635***<br>(-2.63)   | -0.783***<br>(-3.23)    |
| <i>IL6<sub>t-1</sub></i>      | 0.825**<br>(2.01)           | 0.218<br>(0.73)         | 0.010<br>(0.04)        | -0.084<br>(-0.31)      | -0.081<br>(-0.29)       |
| <i>IL8<sub>t-1</sub></i>      | 0.187<br>(0.35)             | 0.164<br>(0.42)         | 0.613*<br>(1.79)       | 0.534<br>(1.47)        | 0.659*<br>(1.81)        |
| <i>TNFα<sub>t-1</sub></i>     | -0.514<br>(-1.04)           | -0.145<br>(-0.41)       | 0.149<br>(0.47)        | -0.091<br>(-0.27)      | 0.003<br>(0.01)         |
| Constant                      | 5.814*<br>(1.86)            | 6.383***<br>(2.82)      | 1.778<br>(0.89)        | 5.955***<br>(2.83)     | 2.181<br>(1.03)         |

$N = 29$ .  $z$  statistics in parentheses; \*:  $p < 0.1$ , \*\*:  $p < 0.05$ , \*\*\*  $p < 0.01$ .

Granger causality Wald test results:

Table 3: Granger causality Wald test results

| Equation        | Excluded      | $\chi^2$ | Degree of Freedom | $p$ value |
|-----------------|---------------|----------|-------------------|-----------|
| Cortisol        | IL-1 $\beta$  | 1.048    | 1                 | 0.306     |
| Cortisol ←      | IL-6          | 4.058    | 1                 | 0.044     |
| Cortisol        | IL-8          | 0.120    | 1                 | 0.729     |
| Cortisol        | TNF- $\alpha$ | 1.084    | 1                 | 0.298     |
| Cortisol        | All           | 11.603   | 4                 | 0.021     |
| IL-1 $\beta$    | Cortisol      | 0.532    | 1                 | 0.466     |
| IL-1 $\beta$    | IL-6          | 0.539    | 1                 | 0.463     |
| IL-1 $\beta$    | IL-8          | 0.178    | 1                 | 0.673     |
| IL-1 $\beta$    | TNF- $\alpha$ | 0.164    | 1                 | 0.685     |
| IL-1 $\beta$    | All           | 3.303    | 4                 | 0.508     |
| IL-6            | Cortisol      | 0.253    | 1                 | 0.615     |
| IL-6 ←          | IL-1 $\beta$  | 10.850   | 1                 | 0.001     |
| IL-6            | IL-8          | 3.195    | 1                 | 0.074     |
| IL-6            | TNF- $\alpha$ | 0.225    | 1                 | 0.635     |
| IL-6            | All           | 16.054   | 4                 | 0.003     |
| IL-8            | Cortisol      | 2.116    | 1                 | 0.146     |
| IL-8 ←          | IL-1 $\beta$  | 6.925    | 1                 | 0.009     |
| IL-8            | IL-6          | 0.094    | 1                 | 0.759     |
| IL-8            | TNF- $\alpha$ | 0.075    | 1                 | 0.784     |
| IL-8            | All           | 7.647    | 4                 | 0.105     |
| TNF- $\alpha$   | Cortisol      | 0.792    | 1                 | 0.373     |
| TNF- $\alpha$ ← | IL-1 $\beta$  | 10.429   | 1                 | 0.001     |
| TNF- $\alpha$   | IL-6          | 0.085    | 1                 | 0.771     |
| TNF- $\alpha$   | IL-8          | 3.280    | 1                 | 0.070     |
| TNF- $\alpha$   | All           | 12.820   | 4                 | 0.012     |

Note: ← represents a significant test results ( $p < 0.05$ ).
